# Supplementary material for: The facile synthesis of a single atom-dispersed silver-modified ultrathin g-C3N4 hybrid for the enhanced visible-light photocatalytic degradation of sulfamethazine with peroxymonosulfate
Source: Royal Society of Chemistry journal article supplement (doi:10.1039/c8dt00919h), 2018-01-01
Supplement: c8dt00919h1.pdf [file c8dt00919h1.pdf]

*Supplementary information for*

***Facile synthesis of single atom-dispersed silver-modified ultrathin g-C<sub>3</sub>N<sub>4</sub> hybrid for the enhanced visible-light photocatalytic degradation of sulfamethazine with peroxymonosulfate***

Fengliang Wang,<sup>a</sup> Yingfei Wang,<sup>a</sup> Yanyan Li,<sup>b</sup> Xuhui Cui,<sup>b</sup> Qianxin Zhang,<sup>a</sup> Zhijie Xie,<sup>a</sup> Haijin Liu,<sup>c</sup> Yiping Feng,<sup>a</sup> Wenying Lv,<sup>a</sup> and Guoguang Liu\*<sup>a</sup>

<sup>a</sup>School of Environmental Science and Engineering, Institute of Environmental Health and Pollution Control, Guangdong University of Technology, Guangzhou, 510006, China

<sup>b</sup>Department of chemistry, School of basic medicine, Xinxiang Medical University, Xinxiang 453003, China

<sup>c</sup>School of Environment, Henan Normal University, Key Laboratory for Yellow River and Huaihe River Water Environment and Pollution Control, Xinxiang 453007, P. R. China.

\* Corresponding Author: Guoguang Liu, E-mail: [liugg615@163.com](mailto:liugg615@163.com), Phone: +86-20-39322547, Fax: +86-20-39322548

**Contents:**

**Text S1.** Determination of concentration of SMT.....3

**Text S2.** Identification of photocatalytic by-products.....3

**Table S1.** Primary properties of water samples.....4

**Table S2.** LC-MS/MS mass spectrometry pieces information and proposed structure of photocatalytic products of SMT.....5

**Fig. S1.** FT-IR spectrum of AgTCM/UCN.....6

**Fig. S2.** High-resolution XPS spectra of A) C 1s and B) N 1s of AgTCM/UCN.....6

**Fig. S3.** Kinetic rate constant of SMT over different A) PMS amounts and B) Ag contents.....6

## TEXTS

### ***Text S1. Determination of concentration of SMT***

The residual concentration of SMT was analyzed on a Shimadzu LC 20A high performance liquid chromatography (HPLC, Japan) equipped with a SPD-M20A diode array detector. Analytical separation was performed by a C18 reversed-phase column (Zorbax Eclipse, 4.6 × 250 mm, 5 μm). The isocratic elution consisted of 20 % acetonitrile and 80 % water with a flow rate of 1 mL·min<sup>-1</sup>. The detection wavelength was set as 266 nm.

### ***Text S2. Identification of photocatalytic by-products***

Samples for SMT degradation products characterization were concentrated by an HLB cartridge (6 mL, 500 mg, Waters Oasis) through solid phase extraction (SPE) process. The by-products of SMT was carried out on an Agilent 1100 series HPLC coupled to a 6410 triple quadrupole mass spectrometer (Agilent Technologies, USA). Separation was accomplished using an Agilent C18 column (5 μm, 4.6 x 150 mm). Elution was performed at a flow rate of 1 mL min<sup>-1</sup> with water as eluent A and acetonitrile containing as eluent B, employing a linear gradient from 10% B to 60% B in 0 – 20 min, 60% B to 100% B in the next 2 min. Mass spectral analysis was conducted in positive mode using an electrospray ionization (ESI) source with the following ion source parameters: scan range of  $m/z = 100-600$ ; fragmentor and capillary voltage were 3.5 kV and 125 V; Nebulizer pressure was 40 psi. Once a potential product was identified, product ion scan MS/MS was performed for structure elucidation.

## TABLES

**Table S1.** Primary properties of water samples.

| Parameter                                  | Unit | Pearl River | WWTP effluent | South China |
|--------------------------------------------|------|-------------|---------------|-------------|
|                                            |      | water       | water         | Sea water   |
| pH                                         | -    | 7.08        | 6.93          | 8.17        |
| UV <sub>254</sub>                          | -    | 0.049       | 0.0588        | 0.0103      |
| UV <sub>400</sub>                          | -    | 0.0052      | 0.0078        | 0.0022      |
| TOC                                        | mg/l | 2.796       | 4.309         | 0.2266      |
| Na <sup>+</sup> <sup>a</sup>               | ppm  | 15.65       | 36.91         | 10100       |
| K <sup>+</sup> <sup>a</sup>                | ppm  | 4.4         | 10.59         | 374         |
| Cu <sup>2+</sup> <sup>a</sup>              | ppb  | 1.04        | /             | 44.07       |
| Mg <sup>2+</sup> <sup>a</sup>              | ppm  | 3.84        | 6.38          | 1340        |
| Al <sup>3+</sup> <sup>a</sup>              | ppb  | 6.11        | 8.29          | 3.12        |
| Cl <sup>-</sup> <sup>b</sup>               | ppm  | 15.61       | 51.35         | 18451.87    |
| HCO <sub>3</sub> <sup>-</sup>              | ppm  | 4.87        | 2.77          | 5.46        |
| SO <sub>4</sub> <sup>2-</sup> <sup>b</sup> | ppm  | 27.25       | 40.26         | 2541.96     |

<sup>a</sup> Detected by ICP-MS.

<sup>b</sup> Detected by anions-ion chromatography.

**Table S2.** LC-MS/MS mass spectrometry pieces information and proposed structure of photocatalytic products of SMT.

| Number | Retention Time/min | [M+H] <sup>+</sup> | Fragment Peaks          | Supposed Structure                                                                   |
|--------|--------------------|--------------------|-------------------------|--------------------------------------------------------------------------------------|
| 1      | 8.5                | 124                | 107, 80, 67             | 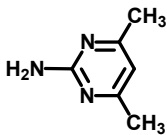  |
| 2      | 10.9               | 215                | 198, 173, 158, 93       |   |
| 3      | 14.5               | 279                | 204, 174, 156, 124      |    |
| 4      | 18.1               | 295                | 215, 186, 124, 108      |   |
| 5      | 19.0               | 309                | 263, 245, 186, 175, 123 |  |

## FIGURES

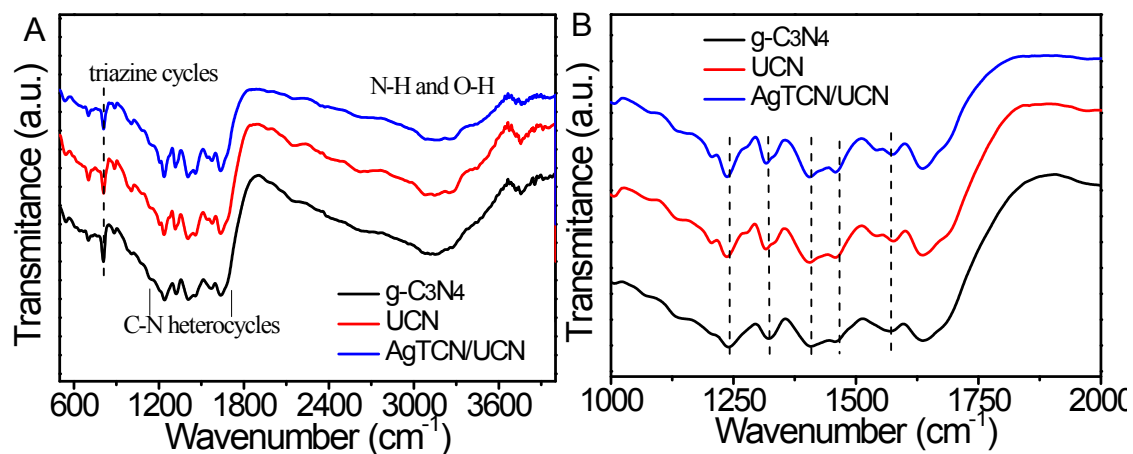

**Fig. S1.** FT-IR spectrum of AgTCM/UCN.

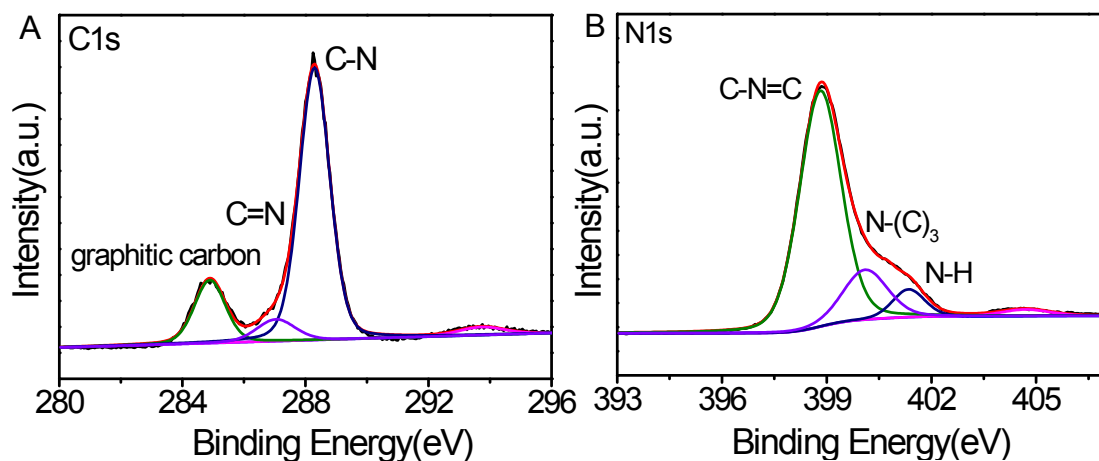

**Fig. S2.** High-resolution XPS spectra of A) C 1s and B) N 1s of AgTCM/UCN.

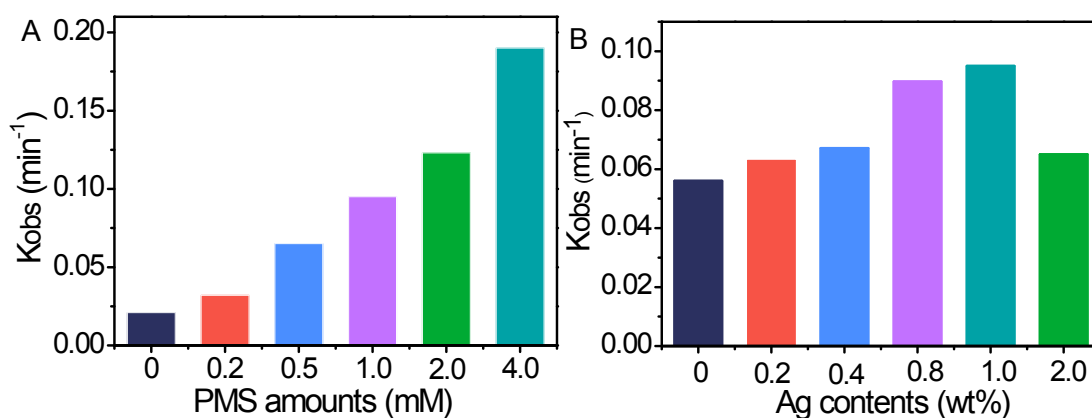

**Fig. S3.** Kinetic rate constant of SMT over different A) PMS amounts and B) Ag contents.
